# Supplementary material
Source: Springer Nature journal article supplement (https://www.springermedizin.de/resource/supplementary/12936_2004_105_MOESM4_ESM.pdf/9546876)

**A**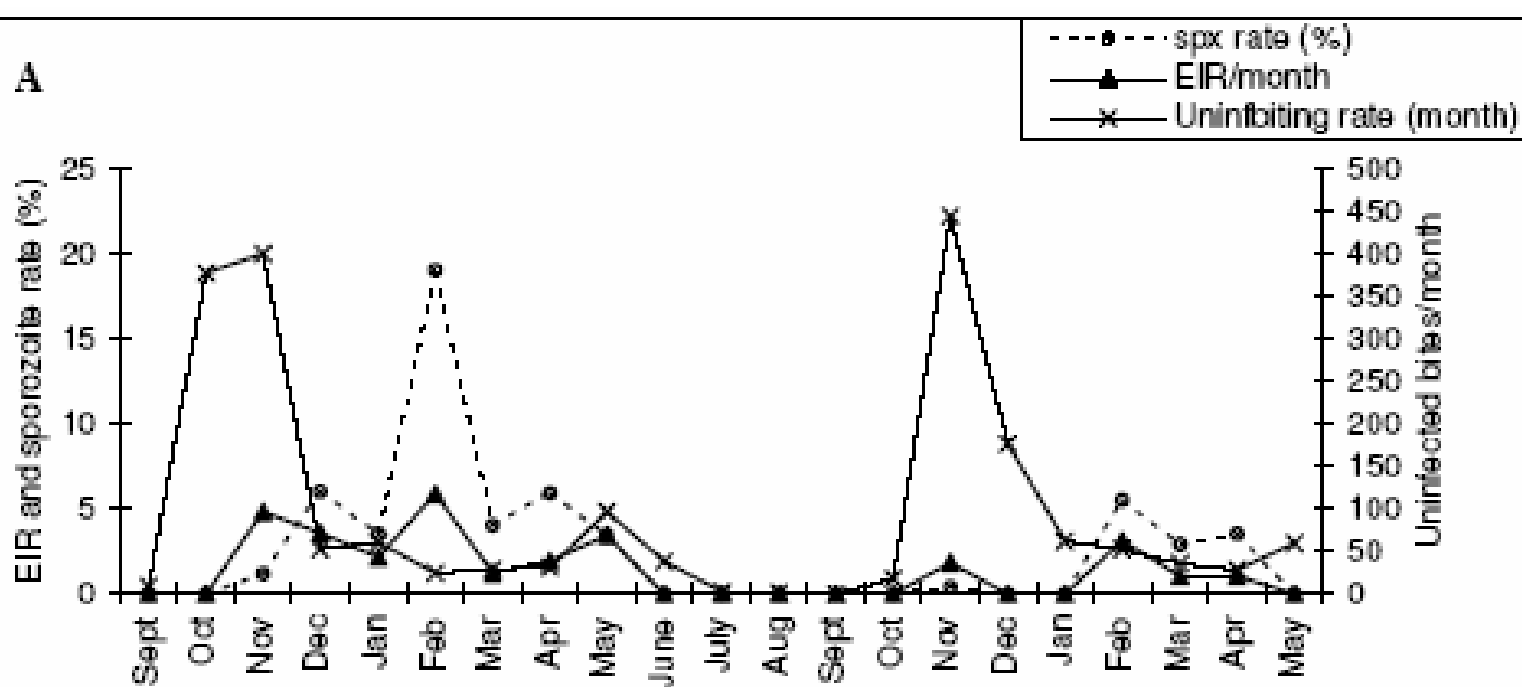**B**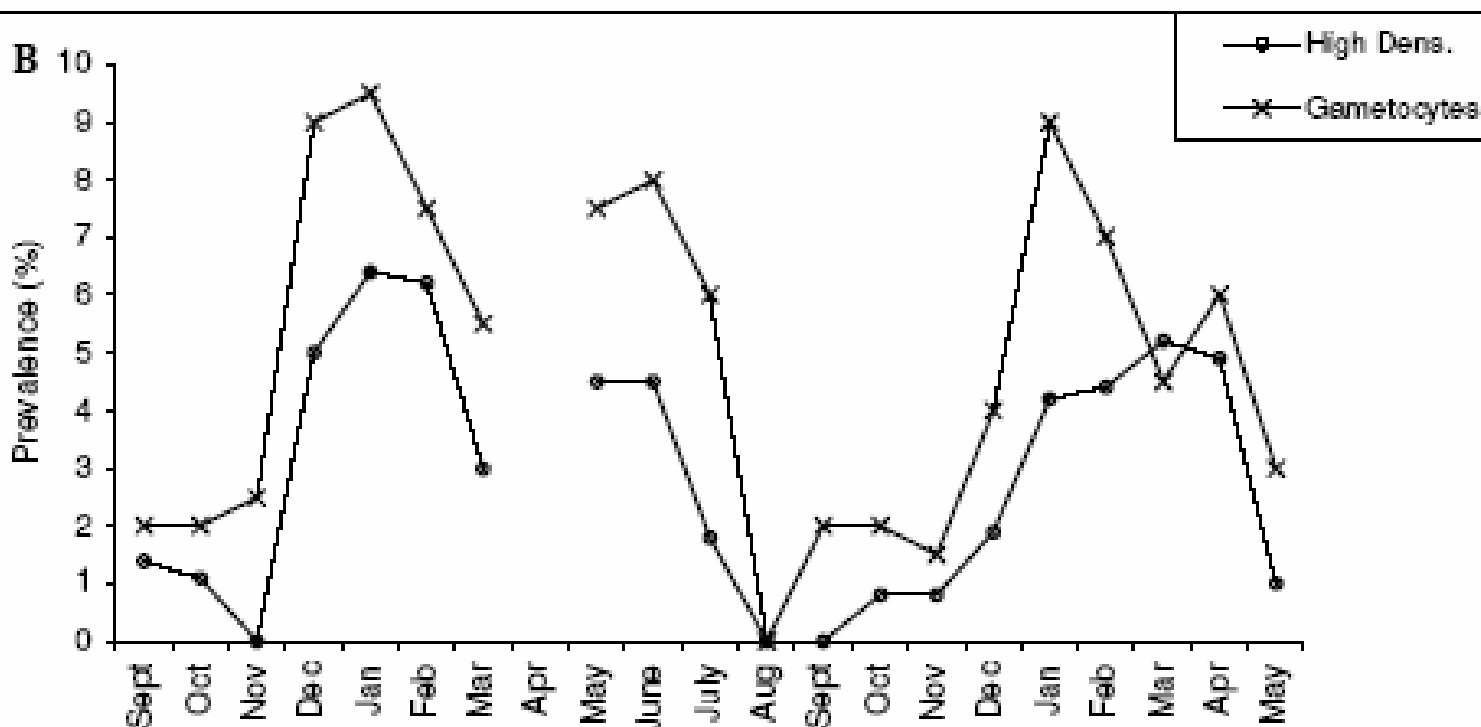**C**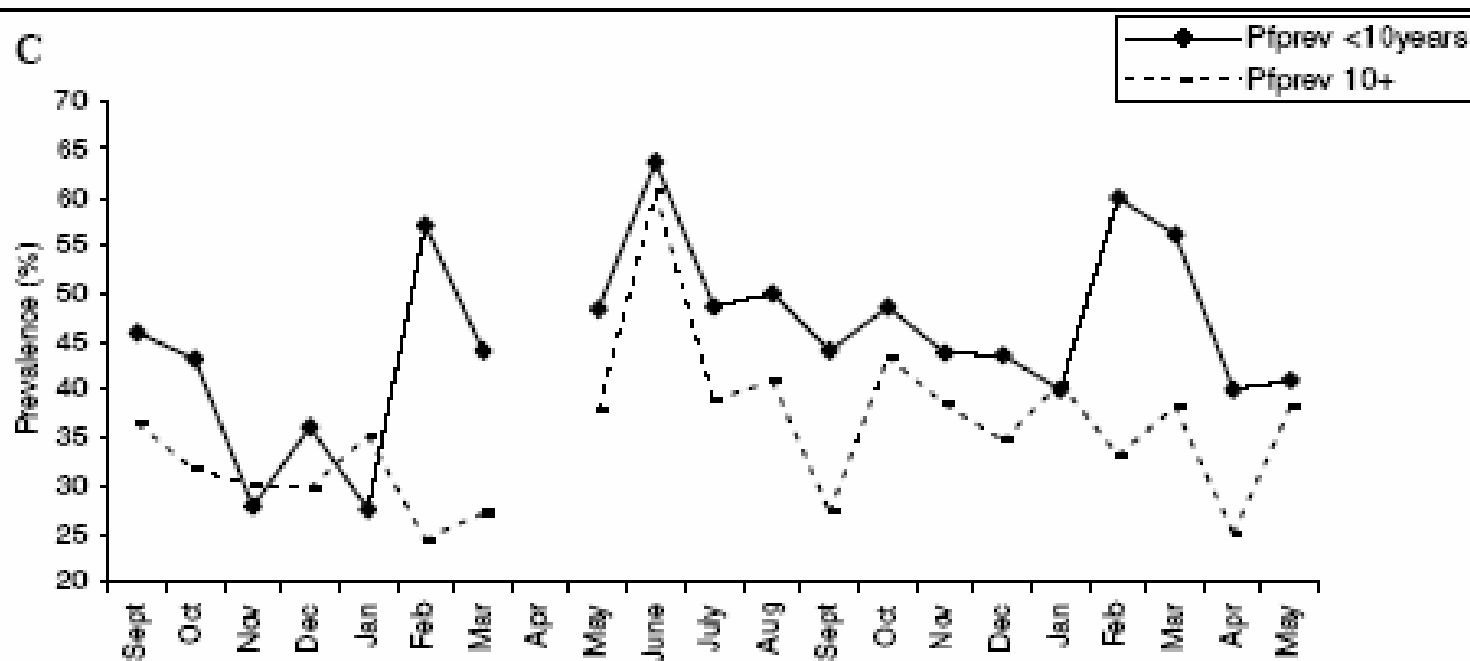

Supplement: MOESM4 [file 9546876]
